# Supplementary material for: Evolution of mosaic operons by horizontal gene transfer and gene displacement in situ
Source: Springer Nature journal article supplement (doi:10.1186/gb-2003-4-9-r55), 2003-08-29
Supplement: Additional file 1 [file gb-2003-4-9-r55-s1.doc]

# Species that were analyzed systematically in this study:

31 bacteria: *Aquifex aeolicus* (Aae), *Bacillus halodurans* (Bha), *Bacillus subtilis* (Bsu), *Streptococcus pyogenes* (Spy), *Staphylococcus aureus* (Sau), *Borrelia burgdorferi* (Bbu), *Campylobacter jejunii* (Cje), *Chlamydia trachomatis* (Ctr), *Chlamydophila pneumoniae* (Cpn), *Deinococcus radiodurans* (Dra), *Escherichia coli* (Eco), *Haemophilus influenzae* (Hin), *Helicobacter pylori* (Hpy), *Lactococcus lactis* (Lla)*, Mesorhizobium loti* (Mlo), *Mycoplasma genitalium* (Mge), *Mycoplasma pneumoniae* (Mpn*), Mycobacterium tuberculosis* (Mtu), *Mycobacterium leprae* (Mle)*, Pasteurella multocida* (Pmu), *Neisseria meningitidis* (Nme), *Pseudomonas aeruginosa* (Pae), *Rickettsia prowazekii* (Rpr), *Synechocystis* PCC6803 (Syn), *Thermotoga maritima* (Tma), *Treponema pallidum* (Tpa), *Vibrio cholerae* (Vch), *Xylella fastidiosa* (Xfa), *Buchnera sp.* (Buc), *Caulobacter crescentus* (Ccr)*,* and *Ureaplasma urealyticum* (Uur), and 10 archaea: *Aeropyrum pernix* (Aer), *Archaeoglobus fulgidus* (Afu), *Halobacterium sp.* (Hsp), *Methanotermobacter thermoautotrophicum* (Mth), *Methanococcus jannaschii* (Mja), *Pyrococcus horikoshii* (Pho), *Pyrococcus abyssi* (Pab), *Thermoplasma volcanium* (Tvo), *Thermoplasma acidophilum* (Tac), and *Sulfolobus solfataricus* (Ssol).

**Table 1S**. List of reference taxons for all species

| Species | Lineage excluded for best hit analysis | Reference taxon |
| --- | --- | --- |
| Aquifex aeolicus | Aquifex | bacteria |
| Bacillus halodurans | Bacillus | firmicutes |
| Bacillus subtilis | Bacillus | firmicutes |
| Streptococcus pyogenes | Streptococcus | firmicutes |
| Staphylococcus aureus | Streptococcus | firmicutes |
| Clostridium acetobutylicum | Clostridium | firmicutes |
| Borrelia burgdorferi | Borrelia | bacteria |
| Campylobacter jejunii | Campylobacter | proteobacteria |
| Chlamydia trachomatis | Chlamydia/ Chlamydophila | bacteria |
| Chlamydophila pneumoniae | Chlamydia/ Chlamydophila | bacteria |
| Deinococcus radiodurans | Deinococcus | bacteria |
| Escherichia coli | Escherichia | proteobacteria |
| Haemophilus influenzae | Haemophilus | proteobacteria |
| Helicobacter pylori | Helicobacter | proteobacteria |
| Lactococcus lactis | Lactococcus | firmicutes |
| Mesorhizobium loti | Mesorhizobium | proteobacteria |
| Mycoplasma genitalium | Mycoplasma | firmicutes |
| Mycoplasma pneumoniae | Mycoplasma | firmicutes |
| Mycobacterium tuberculosis | Mycobacterium | bacteria |
| Mycobacterium leprae | Mycobacterium | bacteria |
| Pasteurella multocida | Pasteurella | proteobacteria |
| Neisseria meningitidis | Neisseria | proteobacteria |
| Pseudomonas aeruginosa | Pseudomonas | proteobacteria |
| Rickettsia prowazekii | Rickettsia | proteobacteria |
| Synechocystis PCC6803 | Synechocystis | bacteria |
| Thermotoga maritima | Thermotoga | bacteria |
| Treponema pallidum | Treponema | bacteria |
| Vibrio cholerae | Vibrio | proteobacteria |
| Xylella fastidiosa | Xylella | proteobacteria |
| Buchnera sp. | Buchnera | proteobacteria |
| Caulobacter crescentus | Caulobacter | proteobacteria |
| Ureaplasma urealyticum | Ureaplasma | firmicutes |
| Aeropyrum pernix | Aeropyrum | archaea |
| Archaeoglobus fulgidus | Archaeoglobus | archaea |
| Halobacterium sp. | Halobacterium | archaea |
| Methanotermobacter thermoautotrophicum | Methanotermobacter | archaea |
| Methanococcus jannaschii | Methanococcus | archaea |
| Pyrococcus horikoshii | Pyrococcus | archaea |
| Pyrococcus abyssi | Pyrococcus | archaea |
| Thermoplasma volcanium | Thermoplasma | archaea |
| Thermoplasma acidophilum | Thermoplasma | archaea |
| Sulfolobus solfataricus | Sulfolobus | archaea |

# CLUSTER 2

COG0055 F0F1-type ATP synthase beta subunit

COG0056 F0F1-type ATP synthase alpha subunit

COG0224 F0F1-type ATP synthase gamma subunit

COG0355 F0F1-type ATP synthase epsilon subunit

COG0356 F0F1-type ATP synthase a subunit

COG0636 F0F1-type ATP synthase c subunit

COG0711 F0F1-type ATP synthase b subunit

COG0712 F0F1-type ATP synthase delta subunit

SPECIES = Rickettsia prowazekii

RP803

RP804

+ COG0712 RP804_HT_suspect F0F1-type ATP synthase delta subunit

COG0056 RP803 F0F1-type ATP synthase alpha subunit

COG0224 RP802

COG0055 RP801

COG0355 RP800

1006372..1006710 - 112 3861327 RP800 - C COG0355 ATP SYNTHASE EPSILON CHAIN (atpC)

1006824..1008248 - 474 3861328 RP801 - C COG0055 ATP SYNTHASE BETA CHAIN (atpD)

1008357..1009223 - 288 3861329 RP802 - C COG0224 ATP SYNTHASE GAMMA CHAIN (atpG)

1009310..1010848 - 512 3861330 RP803 - C COG0056 ATP SYNTHASE ALPHA CHAIN (atpA)

1010985..1011536 - 183 3861331 RP804 - C COG0712 ATP SYNTHASE DELTA CHAIN (atpH)

SPECIES = Ureaplasma urealyticum

UU135

UU128

UU129

UU130

UU131

UU132

UU133

UU134

COG0356 UU137

COG0636 UU136

COG0711 UU135 F0F1-type ATP synthase b subunit

+ COG0712 UU134_HT_suspect F0F1-type ATP synthase delta subunit

+ COG0712 UU133_HT_suspect F0F1-type ATP synthase delta subunit

+ COG0056 UU132_1_HT_suspect (and both Mycoplasmas) F0F1-type ATP synthase alpha subunit

COG0224 UU130 F0F1-type ATP synthase gamma subunit

COG0055 UU129 F0F1-type ATP synthase beta subunit

+ COG0355 UU128_HT_suspect (check)F0F1-type ATP synthase epsilon subunit

169527..169937 - 136 6899087 atpC - - - ATP synthase epsilon chain

169937..171331 - 464 6899088 atpD-2 - - - ATP synthase beta chain

171358..172218 - 286 6899089 atpG - - - ATP synthase gamma chain

172220..173026 - 268 6899090 UU131 - - - unique hypothetical

173026..175425 - 799 6899091 atpA-2 - - - ATP synthase alpha chain

175428..175727 - 99 6899092 atpH-1 - - - ATP synthase delta chain C-term

175737..176276 - 179 6899093 atpH-2 - - - ATP synthase delta chain N-term

176280..176897 - 205 6899094 atpF - - - ATP synthase B chain

176966..177295 - 109 6899095 atpE - - - ATP synthase C chain

177344..178171 - 275 6899096 atpB - - - ATP synthase A chain

178197..178652 - 151 6899097 UU138 - - - conserved hypothetical - cytochrome b

SPECIES = Mycobacterium leprae

ML1138

ML1139

ML1140

+ COG0356 ML1139_HT_suspect

COG0636 ML1140_HT_suspect F0F1-type ATP synthase c subunit/Archaeal/vacuolar-type H+-ATPase subunit K

COG0711 ML1141

COG0711 ML1142_1

COG0712 ML1142_2

COG0056 ML1143

COG0224 ML1144

COG0055 ML1145

COG0355 ML1146

1329962..1330423 + 153 13093119 ML1138 - - - possible integral membrane protein

1330420..1331175 + 251 13093120 atpB ML1139 C COG0356 probable ATP synthase A chain protein

1331271..1331516 + 81 13093121 atpE ML1140 C COG0636 probable ATP synthase C chain

1331538..1332050 + 170 13093122 atpF ML1141 C COG0711 probable ATP synthase B chain

1332056..1333396 + 446 13093123 atpH ML1142 C COG0711 bi-domained ATP synthase B, [Delta]

1333458..1335134 + 558 13093124 atpA ML1143 C COG0056 ATP synthase [alpha] chain

1335152..1336048 + 298 13093125 atpG ML1144 C COG0224 ATP synthase [gamma] chain

1336075..1337532 + 485 13093126 atpD ML1145 C COG0055 ATP synthase [beta] chain

1337565..1337930 + 121 13093127 atpC ML1146 C COG0355 ATP synthase [epsilon] chain

10

NMB1937

XF1146

PA5557

VC2767

BU005

atpH

PM1491

HI0482

HP1135

Cj0104

TM1613

aq 1588

sll1325

Rv1307 2

ML1142 2

CC3450

mll4066

RP804

UU133

UU134

SA1908

BH3757

BS atpH

SP1511

L10679

MG402

MPN601

## COG0712

10

Rv1310

ML1145

BH3754

BS atpD

SA1905

L6563

SP1508

UU054

aq 2038

TM1610

UU129

MG399

MPN598

Cj0107

HP1132

slr1329

RP801

mll4060

CC3447

VC2764

PA5554

BU008

atpD

HI0479

PM1494

NMB1934

XF1143

## COG0055

## COG0056

10

SP1512

L11208

SA1909

BH3758

BS atpF

Rv1307 1

ML1142 1

sll1324

aq 1587

HP1136

Cj0103

UU135

MG403

MPN602

TM1614

sll1323

aq 1586

RP021

mlr7413

CC0366

RP020

mlr7415

CC0365

HP1137

Cj0102

ML1141

Rv1306

XF1147

NMB1938

PA5558

VC2768

BU004

atpF

PM1490

HI0483

## COG0711

10

aq 2041

aq 203

NMB1935

XF1144

BU007

atpG

PA5555

VC2765

HI0480

PM1493

SA1906

SPy0759

L8105

BH3755

BS atpG

sll1327

Rv1309

RP802

mll4063

CC3448

TM1611

UU130

MG400

MPN599

Cj0106

HP1133

## COG224

10

CC3445

mll4059

Cj0108

HP1131

RP800

UU128

MG398

MPN597

XF1142

PA5553

BU009

atpC

VC2763

HI0478

PM1495

NMB1933

aq 673

slr1330

Rv1311

ML1146

BH3753

BS atpC

SA1904

TM1609

L5953

SP1507

## COG0355

## COG0356

10

TM1616

ML1139

Rv1304

PA5560

VC2770

BU002

atpB

PM1488

HI0485

XF1149

NMB1940

sll1322

aq 179

Cj1204c

HP0828

RP023

mlr7411

CC0368

UU137

MG405

MPN604

SP1513

L11729

SA1911

BH3760

BS atpB

10

TM1615

aq 177

ssl2615

BU003

atpE

PA5559

VC2769

NMB1939

XF1148

PM1489

HI0484

SP1514

L11729a

ML1140

Rv1305

BH3759

SA1910

BS atpE

CC0367

RP022

msr7412

UU136

HP1212

Cj0936

MG404

MPN603

CPn0092

CT304

TP0430

BB0090

SSO0567

APE2326

MTH959

MJ0221

SP1321

PH1980

PAB1181

VNG2143G

AF1160

AF1162

DR0696

Ta0001z

TVN0048

## COG0636

############################################

# CLUSTER 3

COG0080 Ribosomal protein L11

COG0081 Ribosomal protein L1

COG0222 Ribosomal protein L7/L12

COG0244 Ribosomal protein L10

COG0250 Transcription antiterminator

COG0690 Preprotein translocase subunit SecE

SPECIES = Rickettsia prowazekii

RP134

RP135

RP136

RP137

RP0139

RP140

+ COG0690 RP134_HT_suspect Preprotein translocase subunit SecE

COG0250 RP135 Transcription antiterminator

0080 RP136

0081 RP137

0244 RP138

0222 RP139

156550..156750 + 66 3860701 RP134 - N COG0690 unknown (secE)

156766..157344 + 192 3860702 RP135 - K COG0250 transcription antitermination protein nusg (nusG)

157477..157914 + 145 3860703 RP136 - J COG0080 50S RIBOSOMAL PROTEIN L11 (rplK)

157917..158633 + 238 3860704 RP137 - J COG0081 50S RIBOSOMAL PROTEIN L1 (rplA)

158721..159230 + 169 3860705 RP138 - J COG0244 50S RIBOSOMAL PROTEIN L10 (rplJ)

159419..159796 + 125 3860706 RP139 - J COG0222 50S RIBOSOMAL PROTEIN L7/L12 (rplL)

160650..164774 + 1374 3860707 RP140 - K COG0085 dna-directed rna polymerase beta chain (rpoB)

164931..169049 + 1372 3860708 RP141 - K COG0086 dna-dir. rna polymerase beta prime chain (rpoC)

170040..171542 + 500 3860709 RP142 - E COG0260 AMINOPEPTIDASE A (pepA)

171634..172428 + 264 3860710 RP143 - D COG1192 unknown

172527..172961 + 144 3860711 RP144 - - - unknown

173034..174851 + 605 3860712 RP145 - J COG0173 ASPARAGINYL-TRNA SYNTHETASE (aspS)

10

aq 1930b

DR2048

msr0269

CC3206

ssl3335

NMB0125

Cj0472

HP1203a

TM0452

TP0235

BB0395

BS secE

BH0117

SP2008

L158071

CT321

CPn0075

RP134

SA0493

ML1907

Rv0638

XF2639

BU040

VC0322

secE

PA4276

PM1745

HI0716

UU580

MPN068

MG055

## COG0690

10

mlr8519

VC0990

rfaH

TM0453

TP0236

BB0394

L157316

SPy0164

SA0494

BS nusG

BH0118

Rv0639

DR2047

sll1742

RP135

NMB0126

PM1744

HI0717

VC0323

BU039

nusG

XF2638

PA4275

mlr0270

CC3205

Cj0473

HP1203

aq 1931

CT320

CPn0076

UU581

MPN067

MG054

APE2176

SSO0347

AF0537

MJ0372

MTH1678

VNG0374G

Ta1425

TVN1443

PH0002

PAB2352

## COG0250

############################################

# CLUSTER 5

COG0040 ATP phosphoribosyltransferase (histidine biosynthesis)

COG0106 Phosphoribosylformimino-5-aminoimidazole carboxamide ribonucleotide (ProFAR)

COG0107 Imidazoleglycerol-phosphate synthase

COG0118 Glutamine amidotransferase

COG0131 Imidazoleglycerol-phosphate dehydratase

COG0139 Phosphoribosyl-AMP cyclohydrolase

COG0140 Phosphoribosyl-ATP pyrophosphohydrolase

COG0141 Histidinol dehydrogenase

SPECIES = Aquifex aeolicus

Aq1968_1

Aq1968_2

+ COG0139 aq_1968_1_HT_suspect (+TM) Phosphoribosyl-AMP cyclohydrolase

COG0140 aq_1968_2 Phosphoribosyl-ATP pyrophosphohydrolase

1384011..1385735 + 574 2984205 polA aq_1967 L COG0749 DNA polymerase I (PolI)

1385746..1386363 + 205 2984200 hisIE aq_1968 E COG0139 phosphoribosyl-ATP pyrophosphohydrolase

1386624..1387808 + 394 2984217 aspC1 aq_1969 E COG0436 aspartate aminotransferase

10

slr0608 1

BH3577 1

BS hisI 1

L0072 1

SA2464 1

VC1139 1

Cj1604 1

PM1206 1

HI0475 1

hisI 1

XF2213 1

BU106 1

DR0733 1

ML1264

Rv1606

TM1035 1

aq 1968 1

AF1950

VNG2284G

MJ1430

MTH245

SSO6227

CC0457

mlr0923

PA5066

NMB0627

## COG0139

10

TM1035 2

SSO6223

ML1309

Rv2122c

XF2213 2

VC1139 2

Cj1604 2

PM1206 2

HI0475 2

BU106 2

hisI 2

aq 1968 2

mlr5018

CC3738

L0072 2

SA2464 2

BS hisI 2

BH3577 2

DR0733 2

NMB0603

PA5067

VNG2596G

slr0608 2

MJ0302

MTH1283

## COG0140

#################################################

# CLUSTER 8

COG0133 Tryptophan synthase beta chain

COG0134 Indole-3-glycerol phosphate synthase

COG0135 Phosphoribosylanthranilate isomerase

COG0147 Anthranilate/para-aminobenzoate synthases component I

COG0159 Tryptophan synthase alpha chain

COG0512 Anthranilate/para-aminobenzoate synthases component II

COG0547 Anthranilate phosphoribosyltransferase

SPECIES = Methanobacterium thermoautotrophicum

MTH1655

MTH1656

MTH1657

MTH1658

MTH1659

MTH1660

MTH1661

1518995..1520389 + 464 2622783 MTH1655 - E COG0147 anthranilate synthase component I

1520389..1520979 + 196 2622784 MTH1656 - E COG0512 anthranilate synthase component II

1520984..1521802 + 272 2622785 MTH1657 - E COG0134 indole-3-glycerol phosphate synthase

1521786..1522511 + 241 2622786 MTH1658 - E COG0135 5'-phosphoribosyl anthranilate isomerase

1522508..1523686 + 392 2622787 MTH1659 - E COG0133 tryptophan synthase, beta subunit

1523724..1524545 + 273 2622788 MTH1660 - E COG0159 tryptophan synthase, subunit alpha

1524542..1525600 + 352 2622789 MTH1661 - E COG0547 anthranilate phosphoribosyltransferase

SPECIES = Halobacterium sp.

+ COG0133 VNG0307G_HT_suspect Tryptophan synthase beta chain

COG0159 VNG0308Gm Tryptophan synthase alpha chain

240541..241296 + 251 10579934 trpC VNG0305G E COG0134 indole-3-glycerol-phosphate synthase

241293..242585 + 430 10579935 trpB VNG0307G E COG0133 tryptophan synthase beta chain

242798..243412 + 204 10579936 trpA VNG0308G E COG0159 tryptophan synthase alpha chain

243437..244234 + 265 10579937 VNG0309C G COG1830 Vng0309c

SPECIES = Bacillus subtilis

pabC

sul

folA

pabB

pabA

folK

COG0147 BS_pabB Anthranilate/para-aminobenzoate synthases component I

+ COG0512 BS_pabA_HT_suspect Anthranilate/para-aminobenzoate synthases component II

82861..84273 + 470 2632341 pabB - E COG0147 para-aminobenzoate synthase (subunit A)

84287..84871 + 194 2632342 pabA - E COG0512 para-aminobenzoate synthase glutamine amidotransferase (subunit B)

84871..85752 + 293 2632343 pabC - E COG0115 aminodeoxychorismate lyase

85734..86591 + 285 2632344 sul - H COG0294 dihydropteroate synthase

86584..86946 + 120 2632345 folA - H COG1539 dihydroneopterin aldolase

86943..87446 + 167 2632346 folK - H COG0801 7,8-dihydro-6-hydroxymethylpterin pyrophosphokinase

SPECIES = Bacillus halodurans

BH0090

BH0091

BH0092

BH0093

BH0094

BH0095

COG0147 BH0090 Anthranilate/para-aminobenzoate synthases component I

+ COG0512 BH0091_HT_suspect Anthranilate/para-aminobenzoate synthases component II

109552..111012 + 486 10172702 pabB - E COG0147 para-aminobenzoate synthase component I

111031..111627 + 198 10172703 pabA - E COG0512 para-aminobenzoate/anthranilate synthase glutamine amidotransferase component II

111611..112498 + 295 10172704 pabC - E COG0115 4-amino-4-deoxychorismate lyase

112476..113318 + 280 10172705 sul - H COG0294 dihydropteroate synthase (dihydropteroate pyrophosphorylase)

113326..113670 + 114 10172706 folA - H COG1539 dihydroneopterin aldolase

113671..114195 + 174 10172707 folK - H COG0801 2-amino-4-hydroxy-6-hydroxymethyldihydropteridin e pyrophosphokinase

114147..114368 + 73 10172708 BH0096 - K COG1396 unknown conserved protein

114382..115386 + 334 10172709 BH0097 - R COG0042 transcriptional regulator involved in nitrogen regulation (NifR3/Smm1 family)

1

aq 706

TM0138

Cj0348

MJ1037

HP1278

BU278

trpB

VC1170

PM0578

HI1431

VNG0307G

CT170

slr0543

PA0036

CC3544

mlr5071

ML1272

Rv1612

XF1375

NMB0699

SA1204

L0049

SP1812

DR0941

BH1663

BS trpB

MTH1659

AF1600

PAB2048

## COG0133

10

TM0137

aq 1548

CT171

slr0966

VNG0308G

Rv1613

DR0942

CC3543

mlr5073

PA0035

NMB0678

XF1376

MJ1038

MTH1660

HP1277

BU277

trpA

VC1169

PM0577

HI1432

Cj0349

L0048

SA1205

BH1664

BS trpA

AF1599

PAB2049

SSO0889

APE2550

TVN1027

Ta0803m

## COG0159

10

slr1867

DR1767

HP1280

BU280

PM0581

HI1389

VC1172

trpD 2

PAB2044

AF1604 2

APE2551

SSO0890

Ta0804

TVN1026

L0052

Cj0346 2

SA1201

VNG1912G

sll1634

aq 209

ybiB

PA2609

VNG1649G

Rv2192c

CC1898

mlr0614

MJ0234

aq 196

TM0141 2

BH1660

BS trpD

MTH1661

PA0650

NMB0967

XF0212

## COG0547

10

mlr2774 1

HP1282

PA1001

HI1387

PM0584

VC1174

trpE

BUpT01

Cj0345

XF1914

MTH1655

APE2553

SSO0893

Rv2386c

TVN1024

Ta0806m

PA4214 1

PA1903 1

MJ1075

VNG1647G

AF1603

PAB2045

SA1199

L0054

SP1817

BH1659

BS trpE

ML1269

Rv1609

aq 1144

NMB1970 1

mlr3005

SP0665 1

SA0669

Cj0862c 1

HP0293 1

Rv1005c

ML0236

L0179 1

PM1464

HI1170

CC2953

PA1758

VC1303

pabB

VNG0384G

DR0196 1

XF0674

slr1979

BH0090

BS pabB

aq 582

XF0210

PA0609

NMB1021

slr0738

TM0142

DR1791

CC1895

## COG0147

10

L0178

PA1002

HP1281

HI1388

PM0583

VC1173

trpD 1

BUpT02

BUpT04

XF1915

Cj0346 1

MJ0238

PAB2046

AF1602

Cj0861c

SA0668

SA1200

PM1463

HI1171

TVN1023

Ta0807

mlr2774 2

DR0196 2

PA4214 2

PA1903 2

L0053

SP1816

MTH1656

APE2555

SSO0894

DR1766

VNG1646G

VNG0386Gm

TM0141 1

slr0055

CC1897

ML0015

Rv0013

aq 549

NMB0966

BH0091

BS pabA

XF0211

PA0649

VC2619

pabA

## COG0512

###################################################

# CLUSTER 27

COG0479 Succinate dehydrogenase/fumarate reductase Fe-S protein

COG1053 Succinate dehydrogenase/fumarate reductase, flavoprotein subunits

COG2009 Succinate dehydrogenase/fumarate reductase cytochrome b subunit

SPECIES = Halobacterium sp.

VNG1306G

VNG1308G

VNG1309G

VNG1310G

+ COG2009 VNG1310G_HT_suspect

no COG VNG1339G – membrane anchor similar to another archaea (Natronomonas pharaonis, Thermoplasma volcanium Thermoplasma acidophilum)

COG1053 VNG1306G

sdhA VNG1306G C COG1053 succinate dehydrogenase subunit A

sdhB VNG1308G C COG0479 succinate dehydrogenase subunit B

sdhD VNG1309G - - membrane anchor , NO COG

sdhC VNG1310G C COG2009 succinate dehydrogenase subunit C

976559..978406 - 615 sdhA VNG1306G C COG1053 succinate dehydrogenase subunit A

978413..979291 - 292 sdhB VNG1308G C COG0479 succinate dehydrogenase subunit B

979298..979660 - 120 sdhD VNG1309G - - membrane anchor

979662..980084 - 140 sdhC VNG1310G C COG2009 succinate dehydrogenase subunit C

10

DR0954

APE0948

SA0994

BS sdhC

BH3093

CT593

CPn0788

Cj0408

HP0193

AF0683

TVN0745

Ta1003

VNG1310G

ML0699

Rv3316

NMB0948

PA1581

VC2091

sdhC

CC3529

XF1070

mll4266

RP126

## COG2009

###################################################

**CLUSTER N29**

COG0230 Ribosomal protein L34

COG0594 RNase P protein component

COG0706 Preprotein translocase subunit YidC

MPN682

MPN681

MPN680

MPN679

MPN678

MPN677

SPECIES = Mycoplasma pneumoniae

+ COG0230 MPN682_HT_suspect Ribosomal protein L34

COG0594 MPN681 RNase P protein component

COG0706 MPN680 Preprotein translocase subunit YidC

800735..802012 - 425 1673826 similar to ATPases

801993..803447 - 484 1673825 gltX glutamyl-tRNA synthetase

803434..804225 - 263 1673824 ksgA S-adenosylmethionine-6-N',N'-adenosyl(rRNA) dimethyltransferase

804218..805375 - 385 1673823 conserved hypothetical protein

805356..805712 - 118 1673822 rnpA RNaseP C5 chain

805702..805848 - 48 1673821 rpmH ribosomal protein L34

805871..806890 - 339 1673820 devA ABC transporter subunit

806892..812540 - 1882 1673819 - conserved hypothetical protein, suggestion: membrane transporter component

812546..813400 - 284 1673818 cysA sulfate transport ATP-binding protein

813468..814787 - 439 1673817 dnaA chromosomal replication initiator protein DnaA

814787..815539 - 250 1673816 hypothetical protein, see: MPN447

815526..816338 - 270 1673815 soj ParA family of ATPases involved in chro

SPECIES = Mycoplasma genitalium

MG466

MG465

MG464

MG463

MG462

MG461

+ COG0230 MG466_HT_suspect Ribosomal protein L34

- COG0594 MG465_HT_suspect RNase P protein component

COG0706 MG464 Preprotein translocase subunit YidC

564926..566203 - 425 3845056 MG461 - - - conserved hypothetical protein

566184..567638 - 484 3845057 MG462 - - - glutamyl-tRNA synthetase (gltX)

567625..568404 - 259 3845058 MG463 - - - dimethyladenosine transferase

568397..569554 - 385 3845059 MG464 - - - conserved hypothetical protein

569526..569912 - 128 3845060 MG465 - - - ribonuclease P protein component (rnpA)

569881..570027 - 48 3845061 MG466 - - - ribosomal protein L34 (rpL34)

570053..570988 - 311 3845062 MG467 - - - ABC transporter, ATP-binding protein

570992..576343 - 1783 3845063 MG468 - - - conserved hypothetical protein

576349..577203 - 284 3845064 MG468.1 - - - ABC transporter, ATP-binding protein

577266..578579 - 437 3845066 MG469 - - - chromosomal replication initiator protein (dnaA)

10

DR2152

BB0440

TP0951

XF2782

RP610

CC0769

msr4809

TM1463a

MG466

MPN682

NMB1904

smr0011

aqq 02

HP1447

Cj0961c

VC0007

BU013

rpmH

PA5570

PM1162

HI0998

L133770

CPn0935

CT785

UU604

BS rpmH

SP1993

SAS093

BH4066

Rv3924c

ML2713

## COG0230

10

slr1469

TM1463

BB0441

TP0950a

XF2781

ML2712

Rv3923c

CC0768

mlr4810

DR2151

RP611

rnpA

BU014

VC0006

PM1163

HI0999

PA5569

NMB1905

CPn0934

CT784

Cj0960c

HP1448

L131443

SP2042

BS rnpA

SA2502

BH4065

UU603

MG465

MPN681

## COG0594

#############################################

**CLUSTER 41**

COG0047 Phosphoribosylformylglycinamidine (FGAM) synthase, glutamine amidotransferase

COG0152 Phosphoribosylaminoimidazolesuccinocarboxamide (SAICAR) synthase

COG1828 Phosphoribosylformylglycinamidine (FGAM) synthase, PurS component

SPECIES = Thermotoga maritima

TM1243

TM1244

TM1245

TM1246

TM1247

TM1248

TM1249

TM1250

TM1251

+ COG0152 TM1243_HT_suspect

COG1828 TM1244

COG0047 TM1245

TM1243 - F COG0152 phosphoribosylaminoimidazole-succinocarboxamide synthase

TM1244 - F COG1828 conserved hypothetical protein

TM1245 - F COG0047 phosphoribosylformylglycinamidine synthase I

TM1246 - F COG0046 phosphoribosylformylglycinamidine synthase II

TM1247 - F COG0034 amidophosphoribosyltransferase

TM1248 - F COG0299 phosphoribosylglycinamide formyltransferase

TM1249 - F COG0138 phosphoribosylaminoimidazolecarboxamide formyltransferase/IMP cyclohydrolase

TM1250 - F COG0151 phosphoribosylamine--glycine ligase

TM1251 - F COG0150 phosphoribosylformylglycinamidine cyclo-ligase

10

VC1190

Rv0780

XF0205

NMB0757

PM0815

HI1726

mll2603

CC3242

aq 2117

RP220

mll0069

CC2491

purC

PA1013

DR0226

Cj0512

slr1226

L177350

SPy0024

SA0918

BH0626

BS purC

PH0239

PAB2400

SSO0626

TM1243

MTH170

MJ1592

AF1272

VNG1939G

Ta0309

TVN1291

## COG0152

10

Cj0513

CC2492

SA0919

slr0519

DR0224

BH0627

BS purS

msl0067

Rv0787a

aq 932a

L177031

SSO6264

TM1244

VNG1944C

PAB3433

MJ1593

MTH169

AF1941

TVN0551

Ta1044m

## COG1828

#######################################################

**CLUSTER 42**

COG0002 Acetylglutamate semialdehyde dehydrogenase

COG0548 Acetylglutamate kinase

SPECIES = Lactococcus lactis

L0104

L0105

L0106

L0107

L0108

COG0002 L0104

+ COG0548 L0107_HT_suspect

argC L0104 E COG0002 N-acetyl-gamma-glutamyl-phosphate reductase (EC 1.2.1.38)

argJ L0105 R COG1364 ornithine acetyltransferase (EC 2.3.1.35) / amino-acid acetyltransferase (EC 2.3.1.1)

argD L0106 E COG0160 acetylornithine aminotransferase (EC 2.6.1.11)

argB L0107 E COG0548 acetylglutamate kinase (EC 2.7.2.8)

argF L0108 E COG0078 ornithine carbamoyltransferase (EC 2.1.3.3)

SPECIES = Thermotoga maritima

TM1780

TM1782

TM1783

TM1784

TM1785

TM1781

COG0002 TM1782

+ COG0548 TM1784_HT_suspect

1756038..1757267 + 409 4982360 TM1780 - E COG0137 argininosuccinate synthase

there is no this gene in *.ptt TM1781 COG0165 Argininosuccinate lyase

1758456..1759475 + 339 4982361 TM1782 - E COG0002 N-acetyl-gamma-glutamyl-phosphate reductase

1759492..1760685 + 397 4982362 TM1783 - R COG1364 glutamate N-acetyltransferase

1760682..1761530 + 282 4982363 TM1784 - E COG0548 acetylglutamate kinase

1761533..1762690 + 385 4982364 TM1785 - E COG0160 acetylornithine aminotransferase

10

XF1002

DR0078

mll8452

CC1378

NMB1787

PA0662

SA0178

L0104

BS argC

BH2900

Cj0224

BU048

argC

PM1118

VC2644

aq 1879

TM1782

sll0080

Rv1652

AF2071

MJ1096

MTH846

PH1720

PAB0291

DR0963

APE1462

SSO0155

## COG0002

10

DR1420

SA0176

BS argB

BH2898

Cj0226

DR2442

L0107

aq 2068

mlr4826

CC0283

slr1898

Rv1654

ML1408

NMB1074

PA5323

TM1784

MJ0069

AF1280

MTH183

XF1001 1

NMB1876 1

PA5204 1

argA 1

BU456 1

PM0828 1

VC2316 1

VC2643

PM1119

argB

BU049

PH1718

PAB0292

SSO0156

APE1461

## COG0548

##############################################

# CLUSTER 48

COG0057 Glyceraldehyde-3-phosphate dehydrogenase/erythrose-4-phosphate dehydrogenase

COG0126 3-phosphoglycerate kinase

SPECIES = Borellia burgdorferi

BB0054

BB0055

BB0056

BB0057

+ COG0057 BB0057

COG0126 BB0056_HT_suspect

50112..50489 - 125 2687950 BB0054 - N COG1314 -

50490..51251 - 253 2687945 BB0055 - G COG0149 -

51253..52434 - 393 2687944 BB0056 - G COG0126 -

52454..53461 - 335 2687943 BB0057 - G COG0057 –

10

BU298

XF0457

TP0844

DR1343

TM0688

BB0057

aq 1065

MG301

MPN430

gapC

SP2012

L0004

L0005

SA0727

NMB2159

Rv1436

ML0570

HP1346

Cj1403c

HP0921

VCA0843

PA3001

VC1069

PA0551

VC0476

epd

NMB0207

PA3195

CC3248

mlr3750

sll1342

BH3149

BS gapB

SA1510

BH3560

BS gap

slr0884

CPn0624

CT505

gapA

VC2000

HI0001

PM0924

PH1830

PAB0257

Ta1103

TVN0458

MJ1146

AF1732

SSO0528

APE0171

MTH1009

## COG0057

VNG0095G

## COG0126

#######################################################

**CLUSTER 54**

COG0137 Argininosuccinate synthase

COG0165 Argininosuccinate lyase

SPECIES = Thermotoga maritima

TM1780

TM1782

TM1783

TM1784

TM1785

TM1781

+ COG0137 TM1780_HT_suspect (check DR)

COG0165 TM1781

1756038..1757267 + 409 4982360 TM1780 - E COG0137 argininosuccinate synthase

there is no that gene in *.ptt TM1781 COG0165 Argininosuccinate lyase

1758456..1759475 + 339 4982361 TM1782 - E COG0002 N-acetyl-gamma-glutamyl-phosphate reductase

1759492..1760685 + 397 4982362 TM1783 - R COG1364 glutamate N-acetyltransferase

1760682..1761530 + 282 4982363 TM1784 - E COG0548 acetylglutamate kinase

1761533..1762690 + 385 4982364 TM1785 - E COG0160 acetylornithine aminotransferase

10

L126739

SA0822

BS argG

BH3187

ML1412

Rv1658

slr0585

aq 1140

XF0999

SSO0638

TVN0927

Ta0650

VNG2437G

AF2252

MJ0429

MTH1254

BU050

VC2642

TM1780

HI1727

PM0813

NMB2129

argG

DR0674

CC0129

mlr4366

Cj0665c

PA3525

## COG0137

## COG0165

####################################################

**CLUSTER N 63**

COG0234 Co-chaperonin GroES (HSP10)

COG0459 Chaperonin GroEL (HSP60 family)

SPECIES = Mycoplasma pneumoniae

MPN574

MPN573

+ COG0234 MPN574_HT_suspect

COG0459 MPN573

695692..697323 - 543 1673939 groEL D02_orf543 - - heat shock protein GroEL

697326..697676 - 116 1673938 groES D02_orf116 - - heat shock protein GroES

SPECIES = Mycoplasma genitalium

MG393

MG392

+ COG0234 MG393_HT_suspect

COG0459 MG392

494984..496615 - 543 3844983 MG392 - - - heat shock protein (groEL)

496628..496960 - 110 3844984 MG393 - - - heat shock protein (groES)

## COG0234

## COG0459

###############################################

# CLUSTER 86

COG0602 Organic radical activating enzymes

COG0720 6-pyruvoyl-tetrahydropterin synthase

SPECIES = Halobacterium sp.

VNG6306C

VNG6305C

- COG0720 VNG6306C_HT_suspect

+ COG0602 VNG6305C

236436..237209 - 257 10584342 VNG6305C VNG6305C O COG0602 Vng6305c

237209..237661 - 150 10584343 VNG6306C VNG6306C H COG0720 Vng6306c

## COG0602

## COG0720

################################################

# CLUSTER N 87

COG0723 Rieske Fe-S protein

COG1290 Cytochrome b subunit of the bc complex

SPECIES = Halobacterium sp.

VNG0582C

VNG0583G

VNG0584H

VNG0585H

VNG0586C

COG0723 VNG0584H

+ COG1290 VNG0583G_HT_suspect

+ COG1290 VNG0582C_HT_suspect

445897..446661 - 254 10580177 VNG0582C VNG0582C C COG1290 Vng0582c

446666..447478 - 270 10580178 cyb VNG0583G C COG1290 cytochrome b6

447481..448311 - 276 10580179 VNG0584H VNG0584H C COG0723 Vng0584h

448314..448700 - 128 10580180 VNG0585H VNG0585H - - Vng0585h

448700..449389 - 229 10580181 VNG0586C VNG0586C - - Vng0586c

## COG0723

## COG1290
